# Supplementary material
Source: PubMed Central journal article supplement (PMC9108025)
Supplement: mmc1.pdf [file mmc1.pdf]

**Cell Reports, Volume 39**

**Supplemental information**

**Ultrapotent and broad neutralization  
of SARS-CoV-2 variants  
by modular, tetravalent, bi-paratopic antibodies**

**Shane Miersch, Nitin Sharma, Reza Saberianfar, Chao Chen, Francesca Caccuri, Alberto Zani, Arnaldo Caruso, James Brett Case, Michael S. Diamond, Gaya K. Amarasinghe, Giuseppe Novelli, and Sachdev S. Sidhu**

## Supplementary Figures and Figure Legends

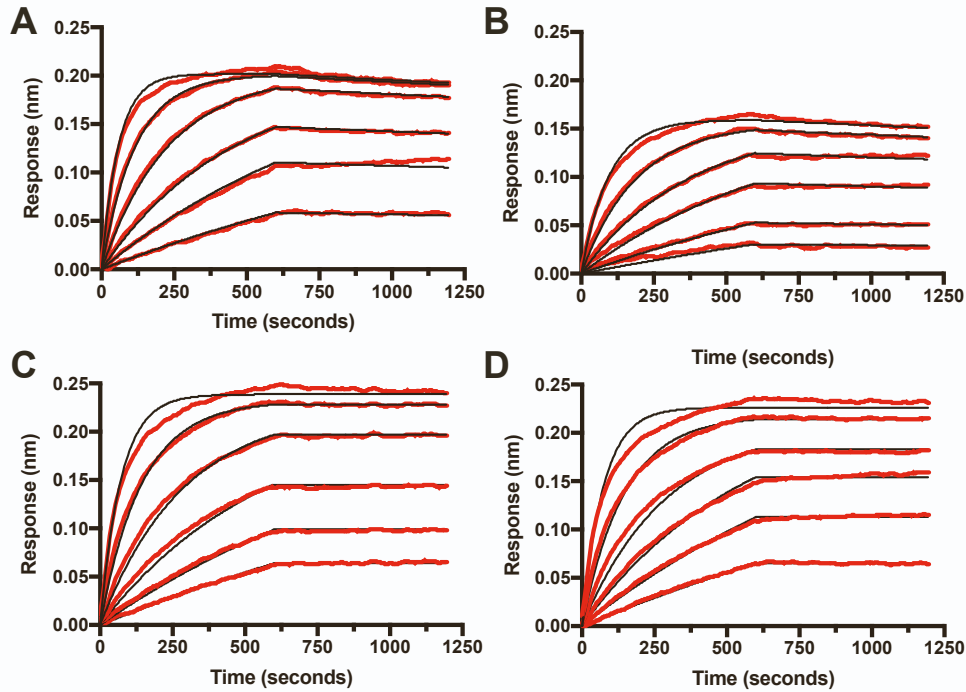

**Figure S1. Binding sensorgrams for nAb:S-protein interactions, related to STAR Methods for BLI interferometry.** Binding signals (red) of nAb-S-protein interactions were determined for **A) IgG 15033-7**, **B) D-Fc 15033-7**, **C) D-Fc-F 33-7:33-7** and **D) D-Fc-F 33-7:36** by biolayer interferometry exposing serial 2-fold nAb dilutions (from 20 nM) to immobilized sensor-immobilized S-protein. Global fits (black) were obtained using a 1:1 binding model.



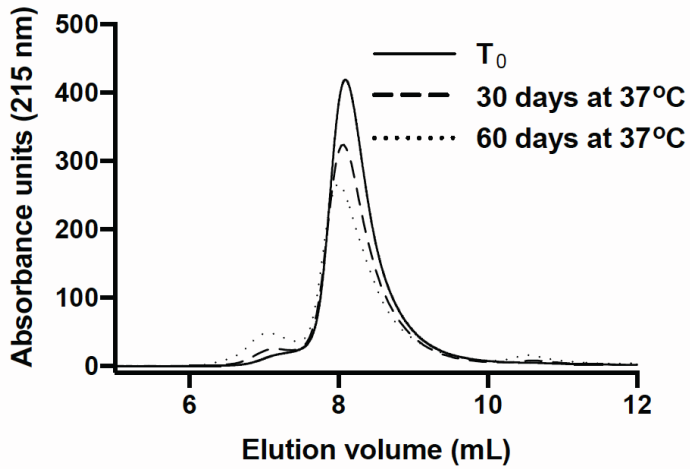

**Figure S3 – SEC analysis of D-Fc-F 33-7:33-7, related to STAR Methods for Size exclusion chromatography** The elution profiles of SEC-purified D-Fc-F 33-7:33-7 in HNS buffer were obtained by SEC analysis immediately following purification ( $T_0$ ) or after 30- (dashed trace) and 60-days (dotted trace) incubation in HNS buffer supplemented with 0.02% sodium azide at 37°C.
